1 ***Streptococcus pneumoniae* infection promotes histone H3 dephosphorylation by**  
2 **modulating host PP1 phosphatase**

3 Wenyang Dong<sup>1,2</sup>, Orhan Rasid<sup>1</sup>, Christine Chevalier<sup>1</sup>, Michael Connor<sup>1</sup>, Matthew Eldridge<sup>1</sup>,  
4 Melanie Anne Hamon<sup>1\*</sup>

5 1. G5 Chromatine et Infection, Institut Pasteur, Paris 75015, France

6 2. Université de Paris, Sorbonne Paris Cité, Paris, France

7 \*Correspondence: melanie.hamon@pasteur.fr

8

9

10

11

12

13

14

15

16

17

18

19

20

21

22

23

24

25

26 **Summary:**

27 Pathogenic bacteria can alter host gene expression through post-translational  
28 modifications of histones. We show for the first time that a natural colonizer, *Streptococcus*  
29 *pneumoniae*, also induces specific histone modifications, including robust dephosphorylation of  
30 histone H3 on serine 10, during infection of respiratory epithelial cells. Two bacterial factors are  
31 important for the induction of this modification: the bacterial toxin PLY, a pore-forming toxin, and  
32 the pyruvate oxidase SpxB, an enzyme responsible for H<sub>2</sub>O<sub>2</sub> production. The combined effects  
33 of PLY and H<sub>2</sub>O<sub>2</sub> lead to host signaling which culminates in H3S10 dephosphorylation, mediated  
34 by the host cell phosphatase PP1. Strikingly, *S. pneumoniae* infection induces  
35 dephosphorylation and associated activation of PP1 catalytic activity. Colonization of cells,  
36 which lacked active PP1, resulted in the impairment of intracellular *S. pneumoniae* survival.  
37 Interestingly, PP1 activation mediating H3S10 dephosphorylation is not restricted to *S.*  
38 *pneumoniae* and appears to be a general epigenomic mechanism favoring intracellular survival.

39 **Keywords:**

40 Histone modification; *Streptococcus pneumoniae*; H3S10 dephosphorylation; Protein  
41 phosphatase 1

42 **Introduction:**

43 *Streptococcus pneumoniae* is a Gram-positive, extracellular bacteria that colonizes the  
44 human nasopharynx and respiratory tract. It is a leading cause of bacterial pneumonia and  
45 meningitis worldwide, particularly in developing nations (1). In the complex relationship with its  
46 host, *S. pneumoniae* can act as both an adapted commensal and an invasive pathogen. On the  
47 one hand, *S. pneumoniae* may reside asymptotically in the upper respiratory tract, a  
48 phenomenon which is particularly common in children and greatly contributes to transmission.  
49 On the other hand, bacteria can breach epithelial barriers, enter the bloodstream, and  
50 eventually cause severe invasive pneumococcal diseases (IPDs), such as pneumonia,  
51 meningitis and sepsis. To date, 98 serotypes of this encapsulated diplococcus have been  
52 described based on variations in their capsule polysaccharide (CPS) (2). However, not all  
53 serotypes are equal in their capacity to cause IPDs, only 20 to 30 of them are principally  
54 associated with invasiveness diseases, such as serotype 1, 4 and 14 (3,4). In contrast, several  
55 serotypes, such as 6B, 11A and 23F, are more likely to be carried for longer periods, and thus  
56 regarded as carriage serotypes (3). However, due to the introduction of pneumococcal

57 conjugate vaccines and prominent capsule switching, the serotype prevalence and distribution  
58 in IPDs and carriage regularly changes.

59 For both carriage and invasive pneumococcal strains, the establishment of colonization  
60 begins upon contact with host respiratory epithelium. *S. pneumoniae* interacts with epithelial  
61 cells via multiple and complex processes, and this multifactorial event has been well  
62 characterized with respect the bacterial factors involved. Surface factors, such as CbpA and  
63 ChoP, have been reported to participate in adhesion to epithelial cells (2). Another major  
64 virulence factor, the pore-forming toxin pneumolysin (PLY), is proposed to be involved in  
65 invasion by breaching the epithelium (5). However, the processes involved in pneumococcal-  
66 epithelial interaction, such as how *S. pneumoniae* modulates host cell signaling is understudied.

67 Recent studies show that pathogens reprogram host cells during infection through  
68 bacteria-triggered histone modifications, which modulate host transcription (6). In eukaryotic  
69 cells, DNA is packaged with histones into chromatin, and the covalent post-translational  
70 modifications at the tails of core histones function to dynamically control DNA accessibility,  
71 affect the recruitment and stabilization of transcription associated factors, and therefore regulate  
72 the cell's transcriptional programs (7). Bacterial pathogens have been shown to target host  
73 histones directly through the secretion of factors targeting chromatin and named  
74 nucleomodulins, or indirectly through modulation of host signaling cascades. However, histone  
75 modifications induced by a natural colonizer, such as *S. pneumoniae* have not yet been  
76 explored.

77 During bacterial infection, histone H3 was found to be dephosphorylated following the  
78 loss of membrane integrity mediated either by the secretion of cholesterol-dependent cytolysin  
79 (CDC) toxin or by insertion of translocon from the type III secretion system (8,9). H3S10  
80 dephosphorylation was shown to be induced *in vitro* in epithelial cells, and to correlate with the  
81 repression of inflammatory genes. Although cellular processes, such as entry into mitosis or  
82 activation by extracellular signals (EGF, cellular stress, or inflammation) have been shown to  
83 associate with H3S10 phosphorylation, its role is unclear (10-12). Key kinase signaling  
84 pathways, including MAPK and NF- $\kappa$ B, induce the phosphorylation of histone H3 on residue 10  
85 (H3S10) or 28 (H3S28), which are important for crosstalk with histone H3 acetylation, a  
86 canonical mark of transcriptional activation (13,14). In contrast, how H3S10 becomes  
87 dephosphorylated is less understood. Furthermore, the molecular basis and the role of this  
88 histone modification during bacterial infection remain unknown.

89 In this manuscript, we show for the first time that *S. pneumoniae* induces histone  
90 modifications in host lung epithelial cells, both *in vitro* and *in vivo*. We identify the CDC toxin  
91 PLY as a key factor in mediating H3 dephosphorylation, but also reveal the strong contribution  
92 of the pyruvate oxidase, SpxB. Both factors PLY and SpxB activate the host phosphatase PP1,  
93 which we show is responsible for H3 dephosphorylation. Interestingly, we find that infection  
94 triggers dephosphorylation of PP1 on threonine 320 (T320) which is required for its activation,  
95 and that this process is necessary to permit efficient intracellular infection. By describing the  
96 molecular basis and the role of H3S10 dephosphorylation, we illustrate a common mechanism  
97 of host alteration by bacteria relevant during both colonization and infection.

## 98 **Results:**

### 99 *Streptococcus pneumoniae* induces dephosphorylation of histone H3 on serine 10 during 100 infection

101 Histone H3 dephosphorylation on serine 10 was initially observed following treatment of  
102 epithelial cells with purified bacterial toxins, including PLY of *S. pneumoniae* (8). In order to  
103 evaluate whether histone H3 phosphorylation is modulated by bacteria during infection, we  
104 exposed A549 lung epithelial cells to two different serotypes of *S. pneumoniae* (R6 or TIGR4) at  
105 increasing multiplicities of infection (MOI) and assessed the phosphorylation of H3S10 by  
106 immunoblotting. As a control, total levels of H3 and actin were also measured. Data in Figure 1A  
107 shows that H3S10 is strongly dephosphorylated, and this effect is proportional to the number of  
108 bacteria used in the infection. We further validated that this effect was not only restricted to  
109 alveolar epithelial A549 cells, as bronchial epithelial Beas-2B cells displayed the same reduction  
110 in H3S10ph levels (Figure S1A). H3T3, H3T11 and H3S28 were also dephosphorylated in  
111 response to bacteria, however H3T6 was not, suggesting only specific residues are targeted  
112 (Figure S1B). Since H3S10 phosphorylation has been previously associated with bacterial  
113 infection (8,15,16), we focused our study on this modification.

114 Given that H3S10 dephosphorylation was observed during infection with two different  
115 laboratory strains, we hypothesized this effect was a shared mechanism among *S. pneumoniae*  
116 serotypes. We assessed clonal representatives of different invasive and carriage serotypes for  
117 their ability to induce H3S10 dephosphorylation. We show that all serotypes tested induced  
118 strong H3S10 dephosphorylation in A549 cells (Figure 1B). These results demonstrate that  
119 reduction of H3S10ph levels is a common feature of *S. pneumoniae* infection and is induced by  
120 clinical isolates as well as laboratory strains.

121 H3S10ph has been associated with the mitotic phase of the cell cycle (17), therefore we  
122 investigated whether the observed loss reflected changes in the cell cycle induced by infection.  
123 Cells were synchronized using thymidine, infected upon release, and the proportion of cells in  
124 each stage of the cell cycle was measured using propidium iodine staining. FACS analysis of  
125 stained cells showed no significant difference in the percentage of cells in each stage between  
126 uninfected and infected cells (Figure S1C), strongly suggesting that infection does not affect the  
127 cell cycle. Furthermore, immunofluorescence experiments were performed to determine  
128 H3S10ph levels in non-mitotic cells. Nuclear staining with DAPI clearly distinguishes cell in  
129 interphase versus mitosis and allows direct visualization of interphase cells, this confirmed that  
130 many cells, which do not have condensed chromosomes, stain positive for H3S10ph (Figure  
131 1C). Quantification of fluorescence intensity upon infection with *S. pneumoniae* shows a  
132 significant reduction compared to uninfected cells (Figure 1C). These data further support the  
133 finding that infection-induced dephosphorylation occurs in interphase cells, independently of the  
134 cell cycle.

135 We next determined whether H3S10 dephosphorylation occurred during *in vivo* infection.  
136 We performed intranasal inoculation of mice with *S. pneumoniae* and used antibodies against  
137 cell lineage markers to specific cell types isolated from collected mouse lungs (Figure S1D). The  
138 levels of H3S10 phosphorylation in epithelial cells after 24h of infection were further evaluated  
139 by FACS analysis. In comparing infected to uninfected cells, a shift in the fluorescence level of a  
140 large proportion of epithelial cells was observed (Figure 1D). Interestingly, dephosphorylation  
141 was mainly detected in epithelial cells, and other monitored cells did not display significant  
142 changes in this histone mark (Figure S1E). These data further support that H3  
143 dephosphorylation occurs in terminally differentiated cells, independently of the cell cycle.  
144 Therefore *S. pneumoniae* induces specific H3S10 dephosphorylation in epithelial cells during  
145 infection.

#### 146 *S. pneumoniae* toxin PLY is important for H3S10 dephosphorylation

147 The cholesterol dependent cytolysin of *S. pneumoniae*, PLY, was previously shown to  
148 induce H3S10 dephosphorylation when treating epithelial cells with purified toxin (8). We thus  
149 hypothesized that PLY was the main factor responsible for this modification during infection.  
150 Chromosomal deletion mutants of PLY were generated in both R6 and TIGR4 strains of *S.*  
151 *pneumoniae* and tested for their ability to dephosphorylate H3. Immunoblotting experiments  
152 show that H3 dephosphorylation is only partially blocked with the  $\Delta ply$  mutant as compared with  
153 wild type infection (Figure 2A). Since PLY does not have a signal sequence for secretion, it is

154 thought that the toxin is release upon lysis of bacteria in a manner dependent on the autolysin  
155 LytA. We therefore generated a *lytA* deletion mutant, which releases less PLY than wild type  
156 bacteria, and induces a similar dephosphorylation of H3 as a  $\Delta ply$  mutant (Figure S2A, B).  
157 Therefore, H3 dephosphorylation is in part mediated by PLY, which is released upon LytA  
158 dependent lysis of a subpopulation of bacteria.

159 To understand how PLY was inducing histone modification, we complemented the  $\Delta ply$   
160 mutant with a PLY bearing a point mutation, W436A, rendering it non-hemolytic (18). We  
161 compared the level of H3S10 phosphorylation of this strain to that of a strain complemented with  
162 wild type PLY. The wild type complement induced the same level of H3S10 dephosphorylation  
163 as wild type bacteria, whereas the W436A mutant phenocopied the  $\Delta ply$  mutant (Figure 2B).  
164 Therefore, PLY contributes to dephosphorylation of H3 in a pore formation-dependent manner.  
165 Given that the level of H3S10ph was clearly not restored to uninfected levels upon infection with  
166 the  $\Delta ply$  mutant, other additional contributing bacterial factors are probably also responsible for  
167 inducing this histone modification.

#### 168 H<sub>2</sub>O<sub>2</sub> generated by SpxB is required for *S. pneumoniae* mediated H3S10 dephosphorylation

169 Reports have shown that stress response, such as oxidative stress, can lead to H3  
170 dephosphorylation (19,20). Interestingly, *S. pneumoniae* expresses a pyruvate oxidase that  
171 converts pyruvate to acetyl-phosphate and generates H<sub>2</sub>O<sub>2</sub> as a byproduct. The produced H<sub>2</sub>O<sub>2</sub>,  
172 which is a molecule freely diffusible across membranes, is high enough to detect in the  
173 supernatant of infected cells, and a deletion of the SpxB oxidase results in a complete block in  
174 H<sub>2</sub>O<sub>2</sub> production (Figure S3A). To determine whether SpxB was contributing to H3  
175 dephosphorylation, we infected cells with a deletion mutant. In both strains R6 and Tigr4 H3  
176 dephosphorylation was prevented upon infection with a  $\Delta spxB$  mutant. In fact, H3 levels were  
177 comparable to the uninfected level upon infection with  $\Delta spxB$  or a double  $\Delta ply\Delta spxB$  mutant  
178 (Figure 3A). Additionally we performed immunofluorescence experiments with the double  
179  $\Delta ply\Delta spxB$  mutant, and quantification of H3S10ph fluorescence intensity shows that the double  
180 mutant does not induce dephosphorylation (Figure 3B).

181 To determine whether *S. pneumoniae* mediated H3 dephosphorylation requires the  
182 catalytic activity of SpxB and H<sub>2</sub>O<sub>2</sub>, the byproduct of catalysis, we generated a  $\Delta spxB$  mutant  
183 complemented with wild type *spxB* and or a catalytically inactive *spxB* (*spxB* P449L) (21). Both  
184 strains were used in infection and the levels of H3S10ph were determined by immunoblotting.  
185 Whereas  $\Delta spxB:spxB$  was able to restore H3 dephosphorylation to wild type levels, the

186 catalytically inactive complement,  $\Delta spxB:spxBP449L$  did not (Figure 3D). To further show that it  
187 is the byproduct of SpxB catalysis,  $H_2O_2$ , rather than other metabolic intermediates, which is  
188 important for H3 dephosphorylation, we performed experiments in the presence of catalase.  
189 Catalase is an enzyme that converts  $H_2O_2$  to water and oxygen and thereby neutralizing the  
190 downstream effects  $H_2O_2$ . Cells infected with  $\Delta ply$  TIGR4 or treated with infection supernatant  
191 displayed significant H3 dephosphorylation (Figure 3E and 3F). However, upon catalase  
192 treatment H3 dephosphorylation was significantly impaired, reinforcing the finding that  $H_2O_2$   
193 produced by SpxB is the main driver for H3 dephosphorylation. In fact,  $H_2O_2$  alone induces H3  
194 dephosphorylation in A549 cells in a dose dependent manner (Figure S3B). Therefore  $H_2O_2$   
195 generated by SpxB is a factor contributing to H3 dephosphorylation in addition to the pore-  
196 forming toxin PLY.

197 In vivo experiments were performed to determine whether SpxB and PLY were  
198 necessary for H3 dephosphorylation in lung epithelial cells. Whereas wild type infection leads to  
199 a significant shift in phosphorylation H3 levels, the double  $\Delta ply\Delta spxB$  mutant does not. In fact,  
200 H3S10 dephosphorylation did not occur when inoculating mice intranasally with the  $\Delta ply\Delta spxB$   
201 mutant (Figure 3C). Therefore both PLY and SpxB are required to induce H3 dephosphorylation  
202 upon infection both *in vitro* and *in vivo* in epithelial cells. We noticed that a single  $\Delta spxB$  mutant  
203 does not induce greater H3S10 dephosphorylation than a double  $\Delta ply\Delta spxB$  mutant. This could  
204 be explained by the finding that a mutant in SpxB is diminished in PLY release and pore-  
205 formation on epithelial cells (22).

#### 206 PP1 is the host phosphatase mediating H3S10 dephosphorylation

207 Given that neither PLY nor SpxB are directly targeting H3S10 for modification, we  
208 searched for a host phosphatase which could mediate the observed dephosphorylation. We first  
209 used chemical inhibitors which target known phosphatases; okadaic acid a potent and selective  
210 inhibitor of protein phosphatase 1 (PP1) and 2A (PP2A), with a greater potency for 2A, and  
211 tautomycetin which specifically inhibits PP1. Cells were pretreated with the two inhibitors and  
212 subsequently infected with either R6 or TIGR4 strains of *S. pneumoniae*. Detection of  
213 phosphorylated H3 levels by immunoblotting show that okadaic acid had no effect, whereas  
214 tautomycetin blocked infection-induced dephosphorylation (Figure 4A and S4A). These results  
215 were further validated by RNA interference using siRNA targeting all isoforms of PP1 ( $\alpha$ ,  $\beta$ ,  $\gamma$ ).  
216 The knock down efficiency siRNA clearly shows that the level of all isoforms is equally  
217 decreased (Figure S4B). Under these conditions H3S10 dephosphorylation was fully blocked  
218 upon infection, similar to the results obtained with tautomycetin (Figure 4B). Consistent with

219 PP1 being the main phosphatase targeting H3, siRNA of PP1 also fully blocked H<sub>2</sub>O<sub>2</sub> and  
220 purified PLY mediated H3 dephosphorylation (Figure 4B, 4C, 4D). Together these results show  
221 that PP1 is the phosphatase involved in dephosphorylating H3 and that both PLY and SpxB  
222 mediate this effect through the same host pathway.

223 Previous studies have demonstrated that other toxins of the CDC family, such as  
224 listeriolysin O (LLO) from *Listeria monocytogenes*, also induced dephosphorylation of H3S10,  
225 but had not identified the mechanism at play (8). Therefore we tested whether PP1 was also  
226 required for LLO induced H3 dephosphorylation. Cells were treated with purified LLO and H3  
227 dephosphorylation was observed in HeLa cells (Figure 4E and 4F). However, upon pretreating  
228 cells with either tautomycin or by silencing the expression PP1 with siRNA, H3  
229 dephosphorylation was blocked (Figure 4E and 4F). Therefore, PP1 is modulated by at least  
230 two bacterial toxins mediating H3S10 dephosphorylation.

### 231 Bacterial infection induces dephosphorylation of PP1

232 In its resting state PP1 is phosphorylated on T320 and dephosphorylation of this residue  
233 correlates with PP1 activation. Therefore we determined whether PP1 was being activated by  
234 infection through dephosphorylation of T320. Firstly, lysates from infected and non-infected cells  
235 were probed by immunoblotting for the total levels of each PP1 isoform (Figure 5A). Importantly,  
236 the total level of PP1 is unaltered by infection regardless of the mutant used. In contrast, the  
237 level of phosphorylated PP1 is significantly decreased upon infection with WT *S. pneumoniae*.  
238 Interestingly, PP1 dephosphorylation was partially rescued upon infection with a  $\Delta ply$  mutant,  
239 and fully prevented upon infection with a  $\Delta spxB$  or the double  $\Delta ply\Delta spxB$  mutant. Therefore the  
240 levels of phosphorylated PP1 fully correlated with the levels of phosphorylated H3S10 (Figure  
241 5B), strongly suggesting that activation of PP1 by dephosphorylation was leading to  
242 dephosphorylation of H3.

243 We confirmed this finding by immunofluorescence by evaluating the level of  
244 phosphorylated PP1 in A549 cells. Interestingly, PP1 became dephosphorylated specifically in  
245 the nucleus of cells infected with WT bacteria, where histone H3 dephosphorylation occurs  
246 (Figure 5C). In contrast, the levels of nuclear phosphorylated PP1 did not change upon infection  
247 with the double  $\Delta ply\Delta spxB$  mutant. Since tautomycin blocked infection-induced H3  
248 dephosphorylation, we measured the corresponding levels of phosphorylated PP1.  
249 Tautomycin fully blocked infection-induced PP1 dephosphorylation, and appeared to induce



250 phosphorylation (Figure 5C, Figure S5A). These results show that the effect of PLY and SpxB  
251 converge on PP1, which likely auto-dephosphorylates itself.

252 Our data show that other toxins in the CDC family, such as LLO, mediate H3  
253 dephosphorylation through PP1. We therefore wanted to determine whether infection with  
254 *Listeria monocytogenes*, which produces LLO, also induced PP1 T320 dephosphorylation. To  
255 address this point, we infected HeLa cells with either wild type *L. monocytogenes*, or a mutant  
256 lacking the LLO toxin ( $\Delta hly$ ). The representative immunoblots in Figure 5D show that WT  
257 bacteria induces dephosphorylation of both H3 and PP1. However, infection with the  $\Delta hly$  strain  
258 did not induce dephosphorylation. Therefore dephosphorylation of PP1, leading to H3  
259 dephosphorylation, is a common mechanism activated by bacteria that produce cholesterol  
260 dependent cytolysins, and is essential for H3 dephosphorylation.

261 Surprisingly, although infection activates PP1, which is a pleotropic enzyme, the general  
262 phosphorylation levels of the host do not seem to be altered. Indeed, we observed no significant  
263 change in the total levels of phosphorylated serine and threonine in total cell lysates upon  
264 infection (Figure S5B). Furthermore, we tested if activated PP1 dephosphorylated non-histone  
265 substrates, such as AKT, a kinase known to be regulated by PP1 (23,24). AKT phosphorylation  
266 at S473 was not altered during *S. pneumoniae* infection (Figure S5B). Therefore, PP1 activation  
267 by infection seems to have some degree of substrate specificity. However, we cannot rule out  
268 that other proteins besides histone H3 are dephosphorylated during infection.

269 H3S10 dephosphorylation correlates with transcriptional repression of inflammatory genes, but  
270 is not required

271 Beyond a correlation with the cell cycle, H3 phosphorylation has been associated with  
272 transcriptional activation of inflammatory genes downstream of LPS stimulation (25). We  
273 therefore hypothesized that the role of H3 dephosphorylation could be to downregulate  
274 inflammatory genes during infection. To test this, we tested the expression of a panel of 26 pro-  
275 inflammatory genes following infection with wild type *S. pneumoniae*, which induces H3  
276 dephosphorylation, and a double  $\Delta ply \Delta spxB$  mutant, which does not. We focused on genes that  
277 were differentially regulated between WT and the  $\Delta ply \Delta spxB$  mutant, and found seven: *CCL2*,  
278 *CCL4*, *CCL5*, *CXCL1*, *TNF*, *CSF2*, and *IL1A*. Strikingly, while infection with wild type did not  
279 significantly change the level of gene expression, the double mutant increased gene expression  
280 compared to uninfected cells (Figure 6). In contrast expression levels of a control gene, HPRT1,

281 were not altered. These results suggest that *S. pneumoniae* actively suppressed inflammatory  
282 gene transcription in epithelial cells, in a manner that is dependent on PLY and SpxB.

283 To determine whether *S. pneumoniae* mediated gene suppression occurred through H3  
284 dephosphorylation, we repeated RT-PCR analyses in the presence of the PP1 inhibitor  
285 tautomycetin. Indeed, since tautomycetin fully blocks H3 dephosphorylation, differential gene  
286 expression between WT and the  $\Delta ply \Delta spxB$  mutant would also be blocked in the presence of  
287 this inhibitor. However, treatment with tautomycetin did not change the transcriptional  
288 repression observed upon infection with wild type bacteria for the genes tested (Figure 6).  
289 These results suggest that although H3 dephosphorylation is correlated with the repression of  
290 inflammatory genes, it is not required for it. We cannot exclude that H3 dephosphorylation could  
291 be mediating transcriptional repression of other genes, which we have not yet identified.

#### 292 Blocking H3S10 dephosphorylation through PP1 inhibition impairs efficient intracellular infection

293 To determine whether PP1-mediated dephosphorylation was necessary for bacterial  
294 infection, we assessed the impact of blocking PP1 catalytic activity, using the chemical inhibitor  
295 tautomycetin, on infection. *In vitro* *S. pneumoniae* mainly remains adhered to the outside of  
296 epithelial cells (26,27). In some instances though, it is able to invade and survive a short period  
297 of time (approximately 24h) inside epithelial cells, a mechanism that could be important for the  
298 “microinvasion” observed *in vivo* (5,28). We first measured the effect of PP1 on bacterial  
299 adherence. We compared the number of bacteria recovered from cells treated or not with  
300 tautomycetin, the PP1 inhibitor. Results in Figure 7A show that there is no significant difference  
301 between the two conditions. Similar results were obtained in evaluating the number of  
302  $\Delta ply \Delta spxB$  mutant bacteria in the presence or absence of tautomycetin (Figure 7A). We also  
303 evaluated the number of intracellular bacteria at 4 and 6 hours post infection. Strikingly, upon  
304 inhibition of PP1 a slight, but significant decrease in the number of recovered intracellular  
305 bacteria was observed at both time points (Figure 7B). These results would suggest that PP1 is  
306 important for intracellular bacterial survival. We further tested the effect of PP1 inhibition on  
307 infection with the double  $\Delta ply \Delta spxB$  mutant. This mutant does not modify PP1 and no H3  
308 dephosphorylation occurs. Interestingly, tautomycetin has no effect on intracellular survival of  
309  $\Delta ply \Delta spxB$  mutant bacteria indicating that this inhibitor is specifically targeting PP1 activity  
310 (Figure 7B).

311 Since *L. monocytogenes*, a facultative intracellular pathogen, also activates PP1 to  
312 dephosphorylate H3, we assessed the impact of PP1 inhibition on its intracellular survival. Cells

313 were infected with *L. monocytogenes* expressing GFP and fluorescence intensity of infected  
314 cells was determined by FACS analysis. Interestingly, tautomycin treated cells were less  
315 infected than non-treated cells further supporting a role for PP1 in intracellular bacterial survival  
316 (Figure 7C). Therefore, bacteria triggered PP1 activation, and probably the downstream H3  
317 dephosphorylation, contribute to optimal intracellular infection of at least two unrelated bacteria.

## 318 **Discussion:**

319 We report here that histone H3 dephosphorylation is a common modification induced not  
320 only by pathogenic bacteria, but also colonizing pneumococci. In fact the bacterial factors  
321 involved in inducing this modification, PLY and SpxB, are common to all *S. pneumoniae*  
322 serotypes. Importantly, we demonstrate with *in vivo* samples that epithelial cells, which are the  
323 first line of response to bacteria entering an organism, are the main cell type affected by this  
324 modification. Furthermore, the ability of bacteria to induce active PP1 and thereby H3  
325 dephosphorylation provides an advantage and is necessary for a productive infection.

326 The role of epithelial cells in a pneumococcal infection has often been overshadowed by  
327 the study of “professional” immune cells. However, more than just barrier cells, epithelial cells  
328 play a pivotal role in dictating pulmonary innate immune responses upon infection (29). In fact,  
329 selectively inhibiting canonical pathways such as NF- $\kappa$ B signaling in epithelial cells results in an  
330 impairment in neutrophil recruitment and poor activation of innate immune responses (30).  
331 Furthermore, the epithelial barrier is responsible for the production of antibacterial components  
332 such as defensins, chemokines and toxic metabolic byproducts (29). Very recently, *S.*  
333 *pneumoniae* at mucosal surfaces was shown to shape epithelial transcriptomic response  
334 including innate signaling and regulatory pathways, inflammatory mediators, cellular metabolism  
335 and stress response genes (27). Since histone modifications play an important role in  
336 regulating gene expression, their modification by bacteria has the potential to significantly alter  
337 host responses. A careful study of epithelial cell subtypes would define whether H3  
338 dephosphorylation is found in epithelial progenitor cells or only in specialized and terminally  
339 differentiated cells. Such studies would be important to determine whether cells experiencing H3  
340 dephosphorylation are turned over or maintained beyond the presence of bacteria. Our findings  
341 that pneumococci modify host histones through active post-translational modification of a host  
342 phosphatase, which gives a growth advantage to bacteria, have far reaching implications for  
343 both virulent and colonizing serotypes.

344 Cell intoxication by cholesterol dependent cytolysins (CDC), including PLY, results in

345 characteristic responses which are hallmarks of membrane damage, including ion fluxes, loss of  
346 cytoplasm, and host cell death (31). However, at sublethal doses, membrane repair and cell  
347 signaling are also important features. Under the conditions used in this study, we do not  
348 observe a significant amount of cytotoxicity to host cells, as determined by normal cellular  
349 morphology (Fig 1) and unaltered cell cycle upon infection (Fig S1). In agreement with these  
350 findings, *in vivo* infections with TIGR4 do not induce noticeable epithelial barrier damage and  
351 influx of inflammatory cells. Therefore, H3 dephosphorylation is most likely not linked to *S.*  
352 *pneumoniae* induced cell death.

353 H3S10 phosphorylation is the most common histone modification linked with bacterial  
354 infection. The activation of both NF- $\kappa$ B and MAPKs, which are the major host cell response  
355 pathways to infection, lead to H3S10 phosphorylation and associated histone acetylation,  
356 resulting in transcriptional activation of target genes (13,14). Several bacterial pathogens have  
357 developed strategies to prevent H3S10 phosphorylation by disrupting pro-inflammatory kinase  
358 signaling pathways, for example, lethal toxin (LT) from *Bacillus anthracis* and type III secretion  
359 system effector OspF from *Shigella flexneri*. Both inactivate MAPKs during infection,  
360 subsequently abrogating histone H3S10 phosphorylation, which correlates with repressing  
361 inflammatory genes (16,32). However bacteria producing CDC toxins are the only ones to  
362 induce dephosphorylation, rather than a block in phosphorylation, which implies that the basal  
363 levels of modified histones are changed. In addition to CDC toxins, we show that production of  
364 H<sub>2</sub>O<sub>2</sub> by *S. pneumoniae* amplifies the observed dephosphorylation. Interestingly, SpxB was  
365 shown to affect the level of PLY release and epithelial cell pore-formation, indicating that the two  
366 proteins share a close link, even though the mechanism is unknown (33). These observations  
367 could explain the phenotype of the  $\Delta$ spxB mutant, which displays levels of H3 phosphorylation  
368 similar to the double  $\Delta$ spxB $\Delta$ ply mutant and to uninfected cells. The production of H<sub>2</sub>O<sub>2</sub>, a freely  
369 diffusible molecule, as metabolic byproduct has been reported for several other bacterial  
370 species, including both opportunistic pathogens, such as streptococci, and probiotic or  
371 commensal enterococci and lactobacilli (34). Therefore, all H<sub>2</sub>O<sub>2</sub> producing bacteria have the  
372 potential to induce H3 dephosphorylation and alter host cell responses.

373 Previous attempts to link H3 dephosphorylation with a cellular effect resulted in  
374 correlative studies. We previously correlated this modification with a loss of expression of a  
375 subset of host genes (8). However, to establish a cause and effect link, inhibiting H3  
376 dephosphorylation is necessary and only possible through inhibition of the enzyme responsible  
377 for the modification. We report here that the chemical inhibitor tautomycin blocks H3

378 dephosphorylation, while previous attempts to identify such an inhibitor had failed (8). This  
379 important step allows us to determine that during infection with *S. pneumoniae*, PP1 mediated  
380 H3S10 dephosphorylation is not necessary for the difference in expression of inflammatory  
381 genes between wild type and mutant strains. Since H3 phosphorylation is tightly linked to  
382 transcriptional regulation (10-12), we hypothesize that *S. pneumoniae* infection may alter the  
383 expression of unidentified genes controlled by basal H3S10 phosphorylation in epithelial cells.  
384 Further studies would be necessary to identify the genes involved.

385 The protein phosphatase PP1 is a major protein serine/threonine phosphatases in  
386 eukaryotic cells (35). PP1 has been shown to target phosphorylated H3S10 mainly after mitosis,  
387 when H3S10 become dephosphorylated (36). The activity of PP1 is regulated through  
388 phosphorylation of T320, which is an inhibitory modification probably masking the PP1 active  
389 site, and blocking PP1 substrates accessibility (37). A previous report suggested that ultraviolet  
390 irradiation induced dephosphorylation of PP1, leading to its activation and triggering subsequent  
391 histone H3T11 dephosphorylation (20). Our data highlights that bacterial infection is able to  
392 activate PP1 through dephosphorylation, a mechanism used for its own benefit. Notably, the  
393 pathways regulated by the PP1-H3 dephosphorylation axis are conserved between at least two  
394 Gram positive bacteria, *L. monocytogenes* and *S. pneumoniae*, and are required for efficient  
395 intracellular infection in both models. Given the pleiotropic role of PP1, we cannot fully rule out  
396 that inhibition of PP1 with tautomycin does not block dephosphorylation of other factors  
397 besides histone H3. This would imply that the impairment of intracellular infection could involve  
398 other hosts signaling pathways. However, our data show that general dephosphorylation upon  
399 infection does not occur and that tautomycin-mediated impairment of infection only occurs  
400 with wild type bacteria, not mutant strains. Although the impact of PP1-H3 dephosphorylation on  
401 bacterial infection is slight, our findings do validate a concept that targeting host chromatin  
402 modifying enzymes alters bacterial infection. Therefore, our study characterizes and extends the  
403 knowledge on a conserved mechanism of host subversion aimed at downplaying host response  
404 to invading bacteria.

405

#### 406 **Acknowledgments:**

407 Work in the M.A.H. laboratory received financial support from Institut Pasteur and the  
408 National Research Agency (ANR-EPIBACTIN). Wenyang Dong is part of the Pasteur - Paris  
409 University (PPU) International PhD Program, a project which has received funding from the  
410 European Union's Horizon 2020 research and innovation programme under the Marie

411 Sklodowska-Curie grant agreement No 665807. Wenyang Dong is supported by the EUR  
412 G.E.N.E. (reference #ANR-17-EURE-0013) and is part of the Université de Paris IdEx #ANR-  
413 18-IDEX-0001 funded by the French Government through its “Investments for the Future”  
414 program. We would like to thank Dr. Patrick Trieu-Cuot, Dr. Thomas Kohler, Dr. Mustapha Si-  
415 Tahar, Dr. Emmanuelle Varon and Dr. Birgitta Henriques for providing the strains used in this  
416 study.

#### 417 **Author Contributions:**

418           Conceptualization, W.D. and M.A.H.; Methodology, W.D. and M.A.H; Investigation, W.D.,  
419 O.R., C.C., M.C., and M.E.; Writing – Original Draft, W.D. and M.A.H.; Writing –Review &  
420 Editing, W.D. O.R., C.C., M.C., M.E., and M.A.H.; Funding Acquisition, M.A.H.; Supervision,  
421 M.A.H. ; Project Administration, M.A.H.

#### 422 **Declaration of Interests:**

423           The authors declare no competing interests.

#### 424 **References:**

- 425 1. Wahl, B., O'Brien, K. L., Greenbaum, A., Majumder, A., Liu, L., Chu, Y., Luksic, I., Nair,  
426 H., McAllister, D. A., Campbell, H., Rudan, I., Black, R., and Knoll, M. D. (2018) Burden  
427 of *Streptococcus pneumoniae* and *Haemophilus influenzae* type b disease in children in  
428 the era of conjugate vaccines: global, regional, and national estimates for 2000-15. *The*  
429 *Lancet. Global health* **6**, e744-e757
- 430 2. Kadioglu, A., Weiser, J. N., Paton, J. C., and Andrew, P. W. (2008) The role of  
431 *Streptococcus pneumoniae* virulence factors in host respiratory colonization and disease.  
432 *Nature reviews. Microbiology* **6**, 288-301
- 433 3. Geno, K. A., Gilbert, G. L., Song, J. Y., Skovsted, I. C., Klugman, K. P., Jones, C.,  
434 Konradsen, H. B., and Nahm, M. H. (2015) Pneumococcal Capsules and Their Types:  
435 Past, Present, and Future. *Clin Microbiol Rev* **28**, 871-899
- 436 4. Mehr, S., and Wood, N. (2012) *Streptococcus pneumoniae*--a review of carriage,  
437 infection, serotype replacement and vaccination. *Paediatric respiratory reviews* **13**, 258-  
438 264
- 439 5. Weiser, J. N., Ferreira, D. M., and Paton, J. C. (2018) *Streptococcus pneumoniae*:  
440 transmission, colonization and invasion. *Nature reviews. Microbiology* **16**, 355-367
- 441 6. Bierne, H., Hamon, M., and Cossart, P. (2012) Epigenetics and bacterial infections. *Cold*  
442 *Spring Harbor perspectives in medicine* **2**, a010272
- 443 7. Hamon, M. A., and Cossart, P. (2008) Histone modifications and chromatin remodeling  
444 during bacterial infections. *Cell host & microbe* **4**, 100-109
- 445 8. Hamon, M. A., Batsche, E., Regnault, B., Tham, T. N., Seveau, S., Muchardt, C., and  
446 Cossart, P. (2007) Histone modifications induced by a family of bacterial toxins.  
447 *Proceedings of the National Academy of Sciences of the United States of America* **104**,  
448 13467-13472
- 449 9. Dortet, L., Lombardi, C., Cretin, F., Dessen, A., and Filloux, A. (2018) Pore-forming  
450 activity of the *Pseudomonas aeruginosa* type III secretion system translocon alters the  
451 host epigenome. *Nature microbiology* **3**, 378-386

- 452 10. Mahadevan, L. C., Willis, A. C., and Barratt, M. J. (1991) Rapid histone H3  
453 phosphorylation in response to growth factors, phorbol esters, okadaic acid, and protein  
454 synthesis inhibitors. *Cell* **65**, 775-783
- 455 11. Sawicka, A., Hartl, D., Goiser, M., Pusch, O., Stocsits, R. R., Tamir, I. M., Mechtler, K.,  
456 and Seiser, C. (2014) H3S28 phosphorylation is a hallmark of the transcriptional  
457 response to cellular stress. *Genome Res* **24**, 1808-1820
- 458 12. Saccani, S., Pantano, S., and Natoli, G. (2002) p38-dependent marking of inflammatory  
459 genes for increased NF-kappa B recruitment. *Nature immunology* **3**, 69-75
- 460 13. Yamamoto, Y., Verma, U. N., Prajapati, S., Kwak, Y. T., and Gaynor, R. B. (2003)  
461 Histone H3 phosphorylation by IKK-alpha is critical for cytokine-induced gene expression.  
462 *Nature* **423**, 655-659
- 463 14. Drobic, B., Perez-Cadahia, B., Yu, J., Kung, S. K. P., and Davie, J. R. (2010) Promoter  
464 chromatin remodeling of immediate-early genes is mediated through H3 phosphorylation  
465 at either serine 28 or 10 by the MSK1 multi-protein complex. *Nucleic Acids Res* **38**,  
466 3196-3208
- 467 15. Saccani, S., Pantano, S., and Natoli, G. (2002) p38-Dependent marking of inflammatory  
468 genes for increased NF-kappa B recruitment. *Nature immunology* **3**, 69-75
- 469 16. Arbibe, L., Kim, D. W., Batsche, E., Pedron, T., Mateescu, B., Muchardt, C., Parsot, C.,  
470 and Sansonetti, P. J. (2007) An injected bacterial effector targets chromatin access for  
471 transcription factor NF-kappaB to alter transcription of host genes involved in immune  
472 responses. *Nature immunology* **8**, 47-56
- 473 17. Sawicka, A., and Seiser, C. (2012) Histone H3 phosphorylation - a versatile chromatin  
474 modification for different occasions. *Biochimie* **94**, 2193-2201
- 475 18. Malet, J. K., Cossart, P., and Ribet, D. (2017) Alteration of epithelial cell lysosomal  
476 integrity induced by bacterial cholesterol-dependent cytolysins. *Cellular microbiology* **19**
- 477 19. Jeong, M. W., Kang, T. H., Kim, W., Choi, Y. H., and Kim, K. T. (2013) Mitogen-activated  
478 protein kinase phosphatase 2 regulates histone H3 phosphorylation via interaction with  
479 vaccinia-related kinase 1. *Molecular biology of the cell* **24**, 373-384
- 480 20. Shimada, M., Haruta, M., Niida, H., Sawamoto, K., and Nakanishi, M. (2010) Protein  
481 phosphatase 1 gamma is responsible for dephosphorylation of histone H3 at Thr 11 after  
482 DNA damage. *Embo Rep* **11**, 883-889
- 483 21. Ramos-Montanez, S., Tsui, H. C., Wayne, K. J., Morris, J. L., Peters, L. E., Zhang, F.,  
484 Kazmierczak, K. M., Sham, L. T., and Winkler, M. E. (2008) Polymorphism and  
485 regulation of the *spxB* (pyruvate oxidase) virulence factor gene by a CBS-HotDog  
486 domain protein (SpxR) in serotype 2 *Streptococcus pneumoniae*. *Molecular microbiology*  
487 **67**, 729-746
- 488 22. Bryant, J. C., Dabbs, R. C., Oswalt, K. L., Brown, L. R., Rosch, J. W., Seo, K. S.,  
489 Donaldson, J. R., McDaniel, L. S., and Thornton, J. A. (2016) Pyruvate oxidase of  
490 *Streptococcus pneumoniae* contributes to pneumolysin release. *BMC microbiology* **16**,  
491 271
- 492 23. Thayyullathil, F., Chathoth, S., Shahin, A., Kizhakkayil, J., Hago, A., Patel, M., and  
493 Galadari, S. (2011) Protein Phosphatase 1-Dependent Dephosphorylation of Akt Is the  
494 Prime Signaling Event in Sphingosine-Induced Apoptosis in Jurkat Cells. *J Cell Biochem*  
495 **112**, 1138-1153
- 496 24. Xiao, L., Gong, L. L., Yuan, D., Deng, M., Zeng, X. M., Chen, L. L., Zhang, L., Yan, Q.,  
497 Liu, J. P., Hu, X. H., Sun, S. M., Liu, J., Ma, H. L., Zheng, C. B., Fu, H., Chen, P. C.,  
498 Zhao, J. Q., Xie, S. S., Zou, L. J., Xiao, Y. M., Liu, W. B., Zhang, J., Liu, Y., and Li, D. W.  
499 (2010) Protein phosphatase-1 regulates Akt1 signal transduction pathway to control  
500 gene expression, cell survival and differentiation. *Cell death and differentiation* **17**, 1448-  
501 1462

- 502 25. Josefowicz, S. Z., Shimada, M., Armache, A., Li, C. H., Miller, R. M., Lin, S., Yang, A.,  
503 Dill, B. D., Molina, H., Park, H. S., Garcia, B. A., Taunton, J., Roeder, R. G., and Allis, C.  
504 D. (2016) Chromatin Kinases Act on Transcription Factors and Histone Tails in  
505 Regulation of Inducible Transcription. *Mol Cell* **64**, 347-361
- 506 26. Novick, S., Shagan, M., Blau, K., Lifshitz, S., Givon-Lavi, N., Grossman, N., Bodner, L.,  
507 Dagan, R., and Mizrahi Nebenzahl, Y. (2017) Adhesion and invasion of *Streptococcus*  
508 *pneumoniae* to primary and secondary respiratory epithelial cells. *Molecular medicine*  
509 *reports* **15**, 65-74
- 510 27. Weight, C. M., Venturini, C., Pojar, S., Jochems, S. P., Reine, J., Nikolaou, E.,  
511 Solorzano, C., Noursadeghi, M., Brown, J. S., Ferreira, D. M., and Heyderman, R. S.  
512 (2019) Microinvasion by *Streptococcus pneumoniae* induces epithelial innate immunity  
513 during colonisation at the human mucosal surface. *Nature communications* **10**
- 514 28. Weight, C. M., Venturini, C., Pojar, S., Jochems, S. P., Reine, J., Nikolaou, E.,  
515 Solorzano, C., Noursadeghi, M., Brown, J. S., Ferreira, D. M., and Heyderman, R. S.  
516 (2019) Microinvasion by *Streptococcus pneumoniae* induces epithelial innate immunity  
517 during colonisation at the human mucosal surface. *Nat Commun* **10**, 3060
- 518 29. Quinton, L. J., and Mizgerd, J. P. (2015) Dynamics of Lung Defense in Pneumonia:  
519 Resistance, Resilience, and Remodeling. *Annu Rev Physiol* **77**, 407-430
- 520 30. Poynter, M. E., Irvin, C. G., and Janssen-Heininger, Y. M. W. (2003) A prominent role for  
521 airway epithelial NF-kappa B activation in lipopolysaccharide-induced airway  
522 inflammation. *J Immunol* **170**, 6257-6265
- 523 31. Cassidy, S. K. B., and O'Riordan, M. X. D. (2013) More Than a Pore: The Cellular  
524 Response to Cholesterol-Dependent Cytolysins. *Toxins* **5**, 618-636
- 525 32. Raymond, B., Batsche, E., Boutillon, F., Wu, Y. Z., Leduc, D., Balloy, V., Raoust, E.,  
526 Muchardt, C., Goossens, P. L., and Touqui, L. (2009) Anthrax lethal toxin impairs IL-8  
527 expression in epithelial cells through inhibition of histone H3 modification. *PLoS*  
528 *pathogens* **5**, e1000359
- 529 33. Bryant, J. C., Dabbs, R. C., Oswald, K. L., Brown, L. R., Rosch, J. W., Seo, K. S.,  
530 Donaldson, J. R., McDaniel, L. S., and Thornton, J. A. (2016) Pyruvate oxidase of  
531 *Streptococcus pneumoniae* contributes to pneumolysin release. *Bmc Microbiol* **16**
- 532 34. Hertzberger, R., Arents, J., Dekker, H. L., Pridmore, R. D., Gysler, C., Kleerebezem, M.,  
533 and de Mattos, M. J. T. (2014) H<sub>2</sub>O<sub>2</sub> Production in Species of the *Lactobacillus*  
534 *acidophilus* Group: a Central Role for a Novel NADH-Dependent Flavin Reductase. *Appl*  
535 *Environ Microb* **80**, 2229-2239
- 536 35. Peti, W., Nairn, A. C., and Page, R. (2013) Structural basis for protein phosphatase 1  
537 regulation and specificity. *Febs J* **280**, 596-611
- 538 36. Wu, J. Q., Guo, J. Y., Tang, W., Yang, C. S., Freel, C. D., Chen, C., Nairn, A. C., and  
539 Kornbluth, S. (2009) PP1-mediated dephosphorylation of phosphoproteins at mitotic exit  
540 is controlled by inhibitor-1 and PP1 phosphorylation. *Nat Cell Biol* **11**, 644-U451
- 541 37. Hou, H. L., Sun, L., Siddoway, B. A., Petralia, R. S., Yang, H. T., Gu, H., Nairn, A. C.,  
542 and Xia, H. H. (2013) Synaptic NMDA receptor stimulation activates PP1 by inhibiting its  
543 phosphorylation by Cdk5. *J Cell Biol* **203**, 521-535
- 544 38. Bricker, A. L., and Camilli, A. (1999) Transformation of a type 4 encapsulated strain of  
545 *Streptococcus pneumoniae*. *Fems Microbiol Lett* **172**, 131-135
- 546 39. Li, Y., Thompson, C. M., and Lipsitch, M. (2014) A Modified Janus Cassette (Sweet  
547 Janus) to Improve Allelic Replacement Efficiency by High-Stringency Negative Selection  
548 in *Streptococcus pneumoniae*. *Plos One* **9**
- 549 40. Eskandarian, H. A., Impens, F., Nahori, M. A., Soubigou, G., Coppee, J. Y., Cossart, P.,  
550 and Hamon, M. A. (2013) A role for SIRT2-dependent histone H3K18 deacetylation in  
551 bacterial infection. *Science* **341**, 1238858



- 552 41. Bostock, C. J., Prescott, D. M., and Kirkpatrick, J. B. (1971) An evaluation of the double  
553 thymidine block for synchronizing mammalian cells at the G1-S border. *Experimental cell*  
554 *research* **68**, 163-168
- 555 42. Livak, K. J., and Schmittgen, T. D. (2001) Analysis of relative gene expression data  
556 using real-time quantitative PCR and the 2(T)(-Delta Delta C) method. *Methods* **25**, 402-  
557 408

558

## 559 **Materials and methods:**

### 560 Antibodies

561 Antibodies used in this study: anti-actin (Sigma, A5441), anti-H3S10ph (Millipore,  
562 MC463), anti-H3 (AbCam, ab1791), anti-H3T3ph (AbCam, ab78531), anti-H3T6ph (AbCam,  
563 ab222768), anti-H3T11ph (AbCam, ab5168), anti-H3S28ph (AbCam, ab5169), anti-PP1 that  
564 specifically recognizes PP1a (Santa Cruz, sc-7482), anti-PP1b that cross-reacts with both PP1b  
565 isoform and PP1c isoform proteins (Millipore, 07-1217), anti-phospho-PP1a (Thr320) antibody  
566 that recognizes all PP1 isoforms (Cell Signaling, 2581s) (20), goat anti-rabbit AF647 (Invitrogen,  
567 A27040), anti-AKT (Cell Signaling, 2920S), anti-phospho-AKT-S473 (Cell Signaling, 9271S),  
568 anti-phospho-(Ser/Thr) Phe (Cell Signaling, 9631S), anti-CD326 (Miltenyi Biotec, REA977), anti-  
569 CD31 (Miltenyi Biotec, REA784), anti-CD45 (Miltenyi Biotec, REA 737).

### 570 Chemical and biological and reagents

571 For experiments involving chemical inhibitors, cells were pretreated for 3h before  
572 infection with Tautomycetin (0.8  $\mu$ M, Tocris Bioscience, 119757-73-2) or Okadaic acid (0.1  $\mu$ M,  
573 Sigma, N0636). Hydrogen peroxide (Sigma, 7722-84-1) was added to the cells for 1h at  
574 indicated concentrations. Purified PLY and LLO were obtained as described previously (8).  
575 Cells were treated with 6 nM LLO or 6 nM PLY for 20 or 30 min.

### 576 Construction of *S. pneumoniae* mutants

577 All primers used in construction of *S. pneumoniae* mutants are listed in Table S1.  
578 Mutants of *S. pneumoniae* were generated by transforming donor DNA into pneumococci using  
579 competence stimulating peptide (CSP) as described previously (38). To create a deletion allele  
580 with selection marker, antibiotic-resistance cassettes were fused with the upstream and  
581 downstream flanking regions of target genes by overlapping PCR. Specifically, *ply* gene was  
582 replaced by with *erm* cassette in  $\Delta$ *ply* mutant; *lytA* gene was replaced by with *erm* cassette in  
583  $\Delta$ *lytA* mutant; in  $\Delta$ *spxB* mutant, *spxB* gene was replaced by *kan+sacB* (KS) cassette, which is a  
584 cassette amplified from Sweet Janus cassette (39). The KS cassette permits allelic replacement

585 or marker-free knock in through sequential positive and negative selection. Therefore, we  
586 constructed *in situ* complement strains using KS cassette. Briefly, using kanamycin-resistance  
587 positive selection, targeted sequence was replaced by KS cassette in chromosome. Using  
588 sucrose sensitivity negative selection, KS cassette was further replaced by either wild-type  
589 genes or genes carrying point mutation. Point mutation was also created by overlapping PCR.

#### 590 Bacterial culture and cell infections

591 All *S. pneumoniae* strains used in this study are listed in Table S2. *S. pneumoniae*  
592 strains were grown in Todd Hewitt broth (Bacto, BD, USA) supplemented with 50 mM HEPES at  
593 37°C with 5% CO<sub>2</sub> until the optical density at 600 nm = 0.6. *L. monocytogenes* strains were  
594 grown in brain-heart infusion medium (Difco, BD, USA) at 37°C with 5% CO<sub>2</sub> until the optical  
595 density at 600 nm = 1. Bacteria were washed twice with PBS and diluted in serum-low cell  
596 culture medium. For *S. pneumoniae* strains, a multiplicity of infection (MOI) of 50:1 for R6 and a  
597 MOI of 25:1 for TIGR4 were used unless otherwise indicated. After 3h of *S. pneumoniae*  
598 infection, cells were washed with PBS for 3 times, and then either collected for future process,  
599 or cultured in medium with penicillin (10 µg/ml) and gentamicin (100 µg/ml) for later time points.  
600 For *L. monocytogenes* strains, which are described previously (8,40), a multiplicity of infection  
601 (MOI) of 50:1 was used. After 1h of Listeria infection, cells were washed with PBS 3 times, and  
602 cultured in medium with 10 µg/ml gentamycin to carry out Listeria infection for late time points.

603 The adherence and intracellular assays of *S. pneumoniae* were performed using A549  
604 cells. A total of  $5 \times 10^6$  R6 pneumococci were added to 24-well tissue culture plates containing  
605  $1 \times 10^5$  cells each well. After 3h infection, cells were washed 3 times with PBS to remove the  
606 unattached bacteria. To determine the amount of adherent pneumococci, PBS washed cells  
607 were lysed using sterile ddH<sub>2</sub>O. Lysates and its serial dilutions were plated on Columbia blood  
608 agar plates (43059, BIOMERIEUX) overnight at 37°C with 5% CO<sub>2</sub>, and the colony forming  
609 units (CFUs) were counted as bacteria adherence. To determine the amount of intercellular  
610 pneumococci, PBS washed cells were cultured in in medium with penicillin (10 µg/ml) and  
611 gentamicin (100 µg/ml) to kill extracellular bacteria. Sterile ddH<sub>2</sub>O was added at 4h time point  
612 after infection (namely 1h after PBS washing) or 6h time point after infection. Lysates and its  
613 serial dilutions were plated on Columbia blood agar plates overnight at 37°C with 5% CO<sub>2</sub>, and  
614 the colony forming units (CFUs) were counted as intercellular bacteria.

#### 615 Cell Culture

616 The human alveolar epithelial cell line A549 (ATCC CCL-185) cells were cultured in F-  
617 12K culture medium supplemented with 10% fetal calf serum (FCS) and 1% glutamine. The  
618 human bronchial epithelial cell line BEAS-2B (ATCC CRL-9609) cells were cultured in DMEM  
619 culture medium supplemented with 10% FCS and 1% glutamine. The human cervical carcinoma  
620 epithelial cell line HeLa (ATCC CCL-2) cells and human Colon Carcinoma cell line CaCO<sub>2</sub>  
621 (ATCC HTB-37) cells were cultured in MEM culture medium supplemented with 1% glutamine, 1  
622 mM sodium pyruvate (GIBCO), 0.1 mM nonessential amino acid solution (GIBCO), and 10%  
623 (HeLa) or 20% (CaCO<sub>2</sub>) FCS. Cells were seeded in 6-well or 24-well plates 2 days before  
624 infection. When cells were grown to semi-confluence (24h time point), they were serum-starved  
625 (0.25% FCS) for 24h before use in experiments.

#### 626 In vivo infections

627 All protocols for animal experiments were reviewed and approved by the CETEA  
628 (Comité d'Ethique pour l'Expérimentation Animale - Ethics Committee for Animal  
629 Experimentation) of the Institut Pasteur under approval number Dap170005 and were  
630 performed in accordance with national laws and institutional guidelines for animal care and use.  
631 Wildtype C57BL/6 female 8-9 week old mice purchased from Janvier Labs (France), *In vivo*  
632 infections were performed by intranasal injection of  $5 \times 10^5$  bacteria per mouse Lungs were  
633 collected after 20h from infection and digested using the Lung Dissociation Kit according to the  
634 manufacturer's instructions (Miltenyi Biotec) plus added Dispase II at 0,1U/ml (Roche). Single  
635 cell suspensions were stained to identify lung epithelial cells (CD45-CD31-CD326+). Cell were  
636 further permeabilized with Transcription Factor Staining Buffer Set (eBioscience) and stained for  
637 H3S10ph followed by secondary. Data was acquired on a MACSQuant cytometer (Miltenyi  
638 Biotec).

#### 639 Cell synchronization and cell cycle analysis

640 Cells were synchronized by a thymidine block as described (41). For cell cycle  
641 distribution, cells were detached in PBS and fixed in 70% ethanol for 1h at  $-20^{\circ}\text{C}$ . Cells were  
642 washed and re-suspended in PBS containing 10  $\mu\text{g/ml}$  of propidium iodide and 100  $\mu\text{g/ml}$  of  
643 RNase (DNase free).

#### 644 FACS Analyses

645 Cells infected with GFP-expressing *L. monocytogenes*, cells stained with propidium  
646 iodide, and cells from lung of infected mice and stained with antibodies, were analyzed on a  
647 FACSCalibur. Data was analyzed using the FlowJo software.

#### 648 Transfection of siRNA

649 Lipofectamine 2000 (Invitrogen, 11-668-019) was used to introduce interference RNA  
650 into A549 cells. Pan PP1 siRNA (Santa Cruz, sc-43545) was transiently transfected (25 nM final  
651 concentration in well) to knockdown all isoforms of PP1. Scramble siRNA (On-TARGETplus  
652 SMARTpool) was transiently transfected as control. Cells were assayed 48h after siRNA  
653 transfection.

#### 654 Immunofluorescence

655 Cells were grown on glass cover slides. After infection, cells were washed 3 times with  
656 PBS and fixed in 4% paraformaldehyde for 10 min at room temperature. After 3 washes, cells  
657 were permeabilized and blocked with 3% BSA with 0.5% Tween20 for 45 min. Immunostaining  
658 was performed with primary antibodies in 3% BSA+ 0.5% Tween20 for 90 min, and then Alexa  
659 Fluor 488 or 647 conjugated anti-immunoglobulin G (IgG) secondary antibodies in 3% BSA+ 0.5%  
660 Tween20 for 45 min.

#### 661 Western blot analyses

662 For Western blot analysis, cells were lysed using 2x laemmli buffer (4% SDS, 20%  
663 glycerol, 200mM DTT, 0.01% bromphenol blue and 0.1 M Tris HCl, pH 6.8). Samples were  
664 sonicated for 5s, boiled for 10 min, and then subjected to SDS-PAGE. Proteins were transferred  
665 to membrane under 2.5A/25V condition for 7min using a semidry transfer system (Trans-Blot  
666 Turbo, BIO-RAD). Transferred membranes were first blocked by TBS-Tween20 (0.1%) with 5%  
667 milk, and then incubated with primary antibodies overnight at 4°C. Membranes were washed  
668 with TBS-Tween20 (0.1%) and incubated with secondary peroxidase-conjugated anti-  
669 immunoglobulin G (IgG) antibodies for 1h at room temperature. After washing with TBS-  
670 Tween20 (0.1%), the immunoreactive bands were visualized using ECL substrate (Clarity  
671 Western ECL substrate, BIO-RAD) and imaged with a Western Blot detection system  
672 (ChemiDoc Imaging Systems, BIO-RAD). Quantification of Western blots was performed using  
673 Image Lab (BIO-RAD).

#### 674 RNA extraction and Quantitative PCR analyses

675           The mRNA was extracted from cells using an RNeasy kit (Qiagen, 74104). DNase  
676 treatment was performed using a DNase set (Qiagen, 79254). cDNA was then synthesized  
677 using 1 µg input RNA by BIO-RAD iScript gDNA Clear cDNA Synthesis Kit (1725035). Real-  
678 time PCR was performed using using the SYBR Green kit (iTaq Universal SYBR Green  
679 Supermix, BIO-RAD, 1725124) on a BIO-RAD CFX384. Data was obtained using BIO-RAD  
680 CFX manager. Relative gene expression analysis was performed using the  $2^{-\Delta\Delta CT}$  method as  
681 described (42). All primers used in quantitative PCR analyses are listed in Table S3.

## Figures:

Figure 1.

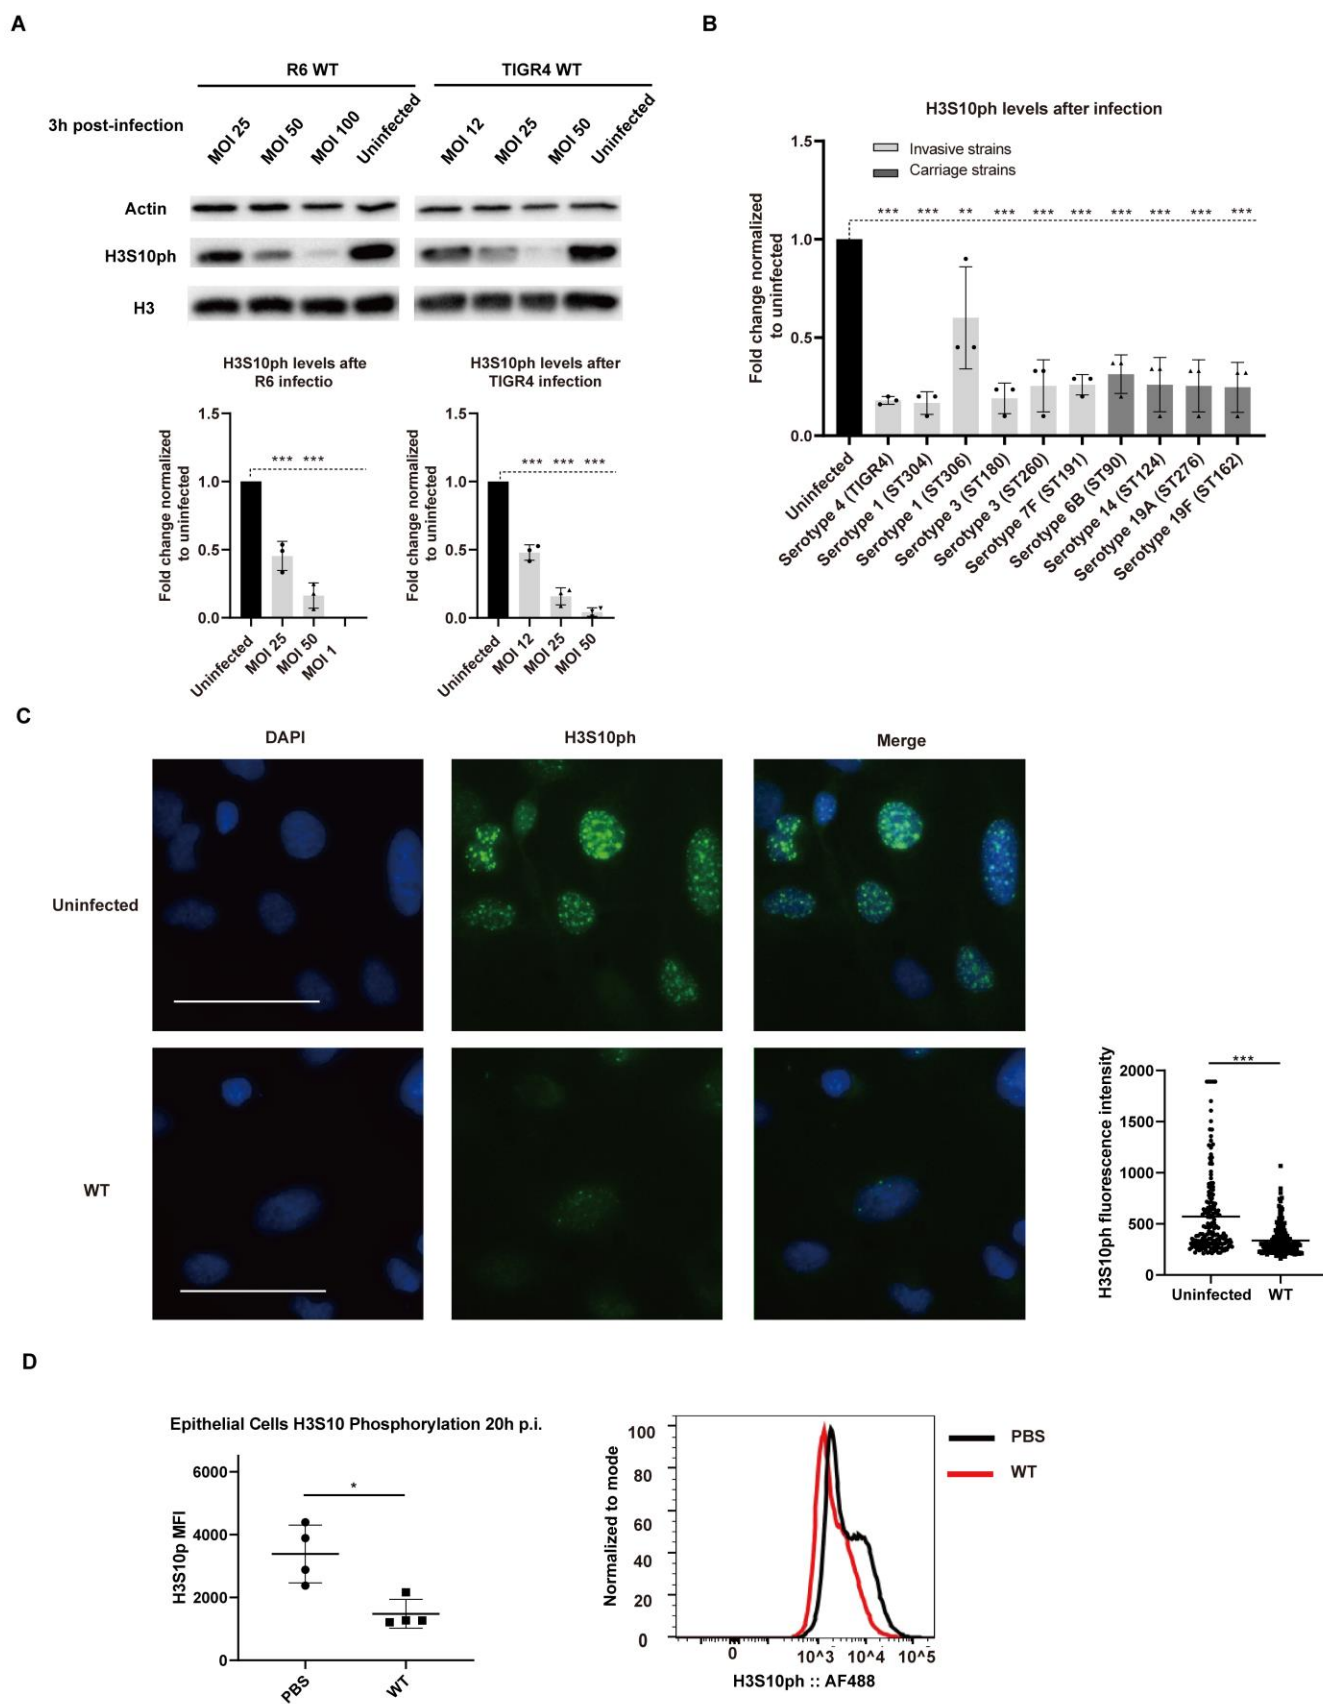

**Fig.1. *Streptococcus pneumoniae* induces specific dephosphorylation of histone H3 on serine 10 independently of the cell cycle.**

**(A)** Phosphorylation levels of histone H3S10 as detected by immunoblotting in uninfected A549 cells and cells infected with *S. pneumoniae* strain R6 or TIGR4 at the indicated multiplicity of infection (MOI). Quantification of H3S10ph immunoblots, normalized first to total actin levels and then to the uninfected sample. Error bars represent SD of 3 independent experiments. Statistical significance was calculated using One-way ANOVA method (Dunnett's Post Hoc test, uninfected as control group), \*\*\*P < 0.001. **(B)** Quantification of levels of H3S10 phosphorylation detected by immunoblotting in uninfected A549 cells and cells infected with TIGR4 or clinical *S. pneumoniae* strains (from carriage or invasiveness), serotypes and MLST types at MOI 25 are indicated. Error bars represent SD of 3 independent experiments. Statistical significance was calculated using One-way ANOVA method (Dunnett's Post Hoc test, uninfected as control group), \*\*P < 0.01, \*\*\*P < 0.001. **(C)** H3S10ph was detected by immunofluorescence in Beas-2B cells under uninfected and 1h TIGR4 (MOI=25) infected conditions. Size bars represent 50  $\mu$ m. On the right, the quantification of nuclear fluorescence intensity integrates independent duplicate experiments (n  $\geq$  200 cells per condition). Statistical significance was calculated using a Student's t test, \*\*\*P < 0.001. **(D)** H3S10ph levels of lung epithelial cells from mice treated with PBS or infected with *S. pneumoniae* TIGR4 ( $5 \times 10^6$  CFU) for 20 hours were analyzed by FACS. Mean fluorescence intensity (MFI) is represented with error bars indicating SD, n = 4 mice per condition. Statistical significance was calculated using a Student's t test, \*P < 0.05.

**Figure 2.**

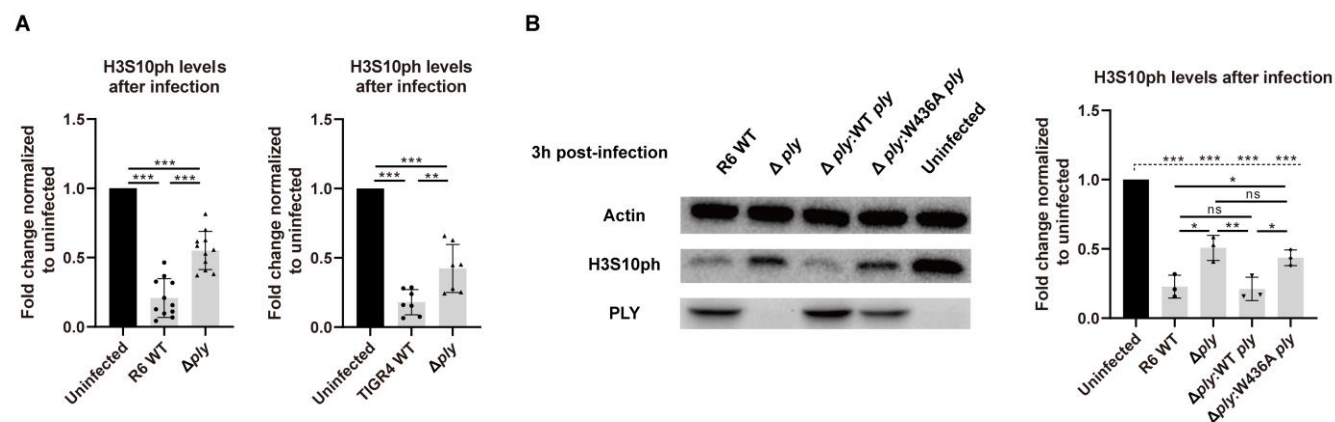

**Fig.2. *S. pneumoniae* toxin PLY is important for H3S10 dephosphorylation.**

(A) Quantification of H3S10ph in uninfected cells, cells infected with wild-type *S. pneumoniae* strains R6 (MOI=50) and TIGR4 (MOI=25), and their respective  $\Delta$ ply mutant strains for 3 h. (B) Representative immunoblots of cells infected with wild-type *S. pneumoniae* (R6 strain), a  $\Delta$ ply mutant, a  $\Delta$ ply mutant complemented with wild-type ply, or a ply point mutant without pore-forming activity (W436A) at MOI 50 for 3 h.

All quantifications in graphs show the mean  $\pm$  SD of at least 3 independent experiments. Statistical significance was calculated using One-way ANOVA method (Turkey Post Hoc test when compared within infection groups as indicated with solid line, or Dunnett's Post Hoc test when compared to uninfected control as indicated with dotted line), \*P < 0.05, \*\*P < 0.01, \*\*\*P < 0.001.



**Figure 3.**

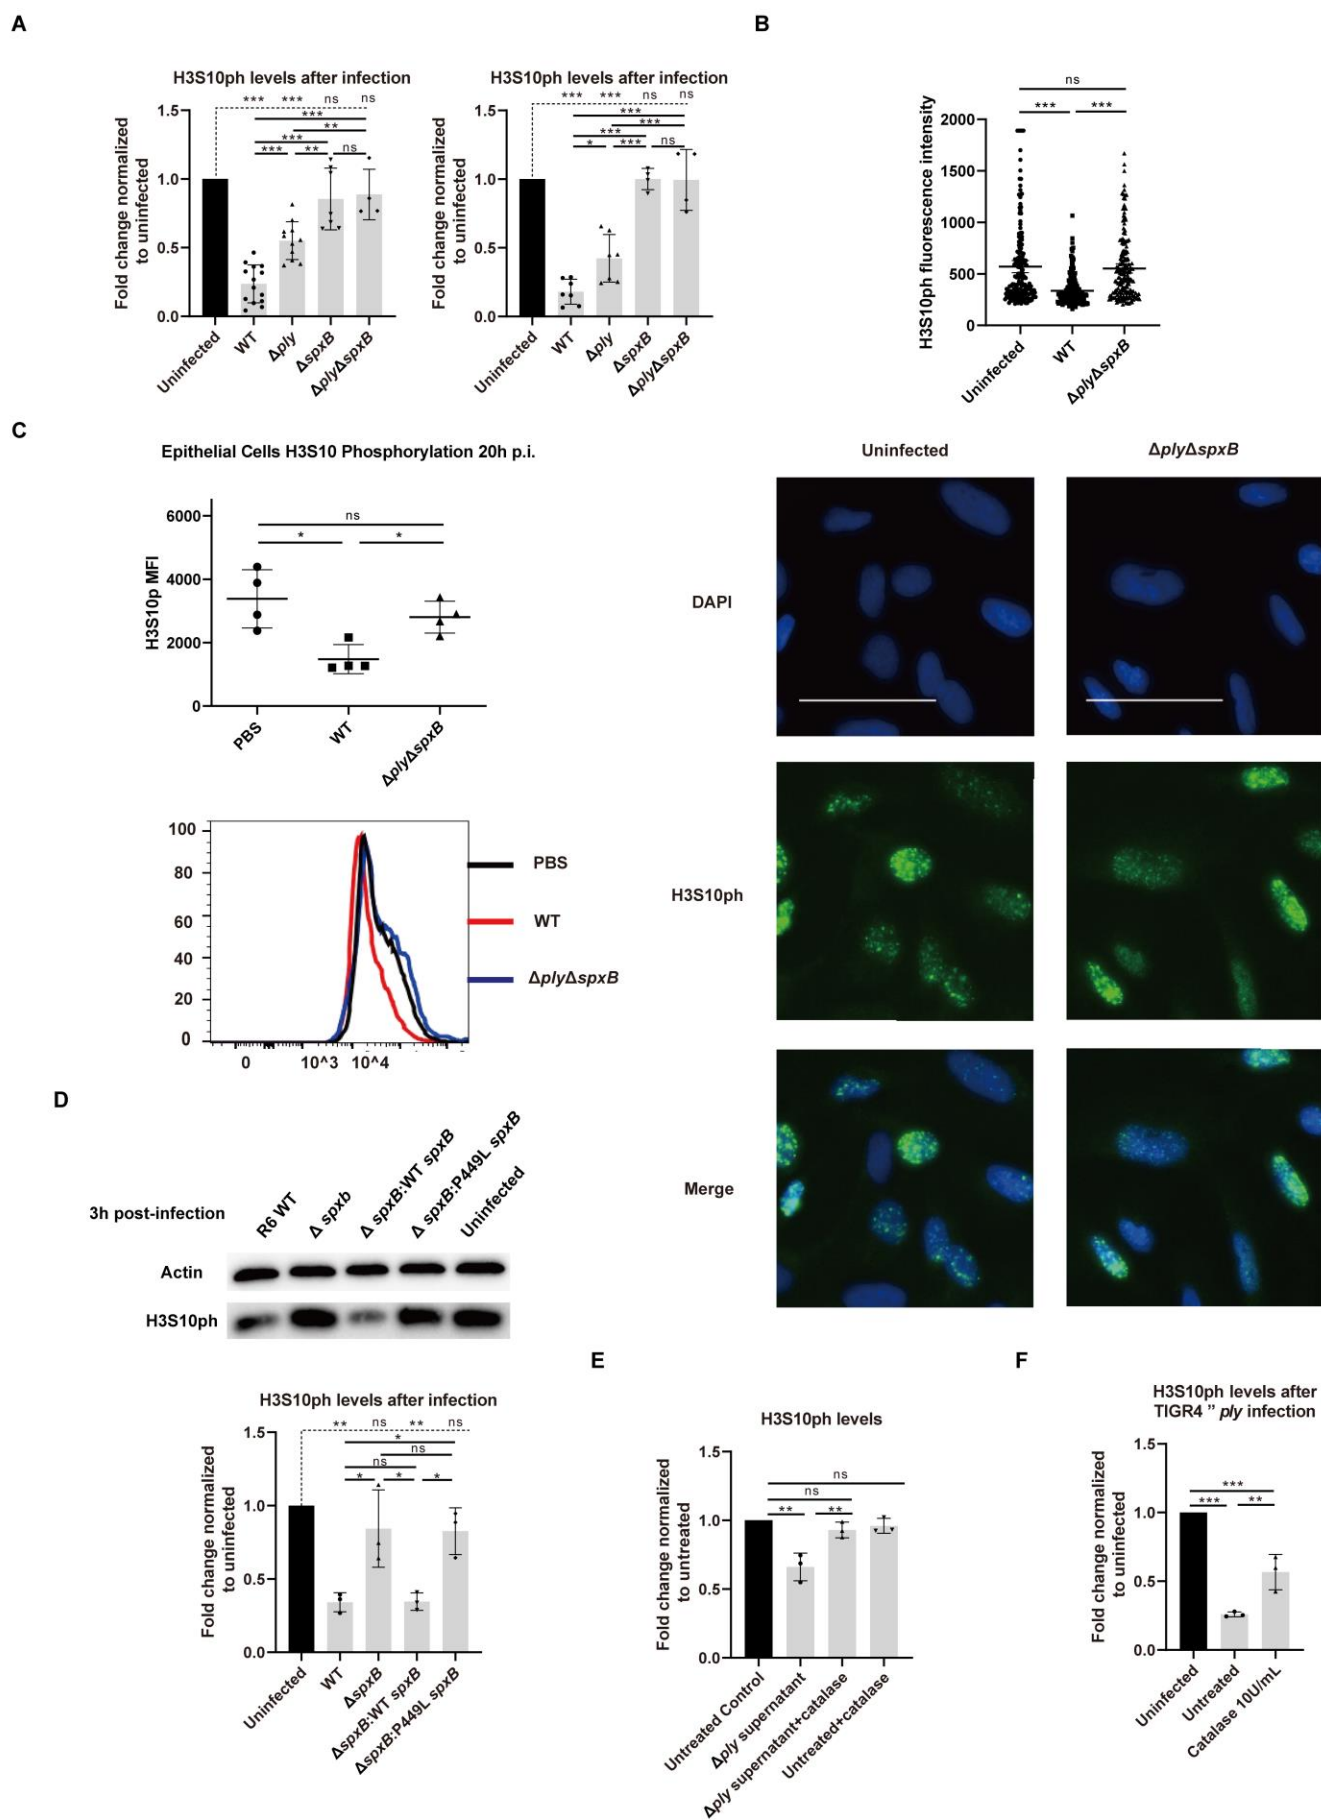

**Fig.3. H<sub>2</sub>O<sub>2</sub> generated by SpxB is required for *S. pneumoniae* mediated H3S10 dephosphorylation.**

(A) Quantification of H3S10ph in uninfected cells, cells infected with wild-type *S. pneumoniae* strains R6 (MOI=50) and TIGR4 (MOI=25), a  $\Delta ply$  mutant, a  $\Delta spxB$  mutant, or a  $\Delta ply\Delta spxB$  double mutant for 3 h. (B) H3S10ph was detected by immunofluorescence in Beas-2B cells under uninfected and 1h (MOI=25) infected conditions. On the right, the quantification of nuclear fluorescence intensity integrates independent duplicate experiments ( $n \geq 200$  cells per condition). Size bars represent 50  $\mu\text{m}$ . (C) H3S10ph levels of lung epithelial cells from mice treated with PBS, wild-type *S. pneumoniae* TIGR4 ( $5 \times 10^6$  CFU), or a  $\Delta ply\Delta spxB$  double mutant ( $5 \times 10^6$  CFU) for 20 hours were analyzed by FACS. Mean fluorescence intensity (MFI) is represented with error bars indicating SD,  $n = 4$  mice per condition. (D) Immunoblot images are shown on the left and quantifications on the right. The left image is shown for representative immunoblots of cells infected with wild-type *S. pneumoniae* (R6 strain), a  $\Delta spxB$  mutant, a  $\Delta spxB$  mutant complemented with wild-type *spxB*, or a *spxB* point mutant without catalytic activity (P449L) at MOI 50 for 3 h. (E) Cells were incubated 2h with the filter-sterilized supernatant from infection wells, or with 15 min catalase pretreated filter-sterilized supernatant, or 15 min catalase pretreated cell culture medium, respectively. (F) Quantification of H3S10ph in uninfected cells, cells infected with TIGR4 *ply* mutant (with or without catalase during infection) at MOI 25 for 3 h.

Error bars in the quantifications represent SD of at least 3 independent experiments. Statistical significance was calculated using One-way ANOVA method (Turkey Post Hoc test when compared within infection groups as indicated with solid line, or Dunnett's Post Hoc test when compared to uninfected control as indicated with dotted line), \* $P < 0.05$ , \*\* $P < 0.01$ , \*\*\* $P < 0.001$ .

**Figure 4.**

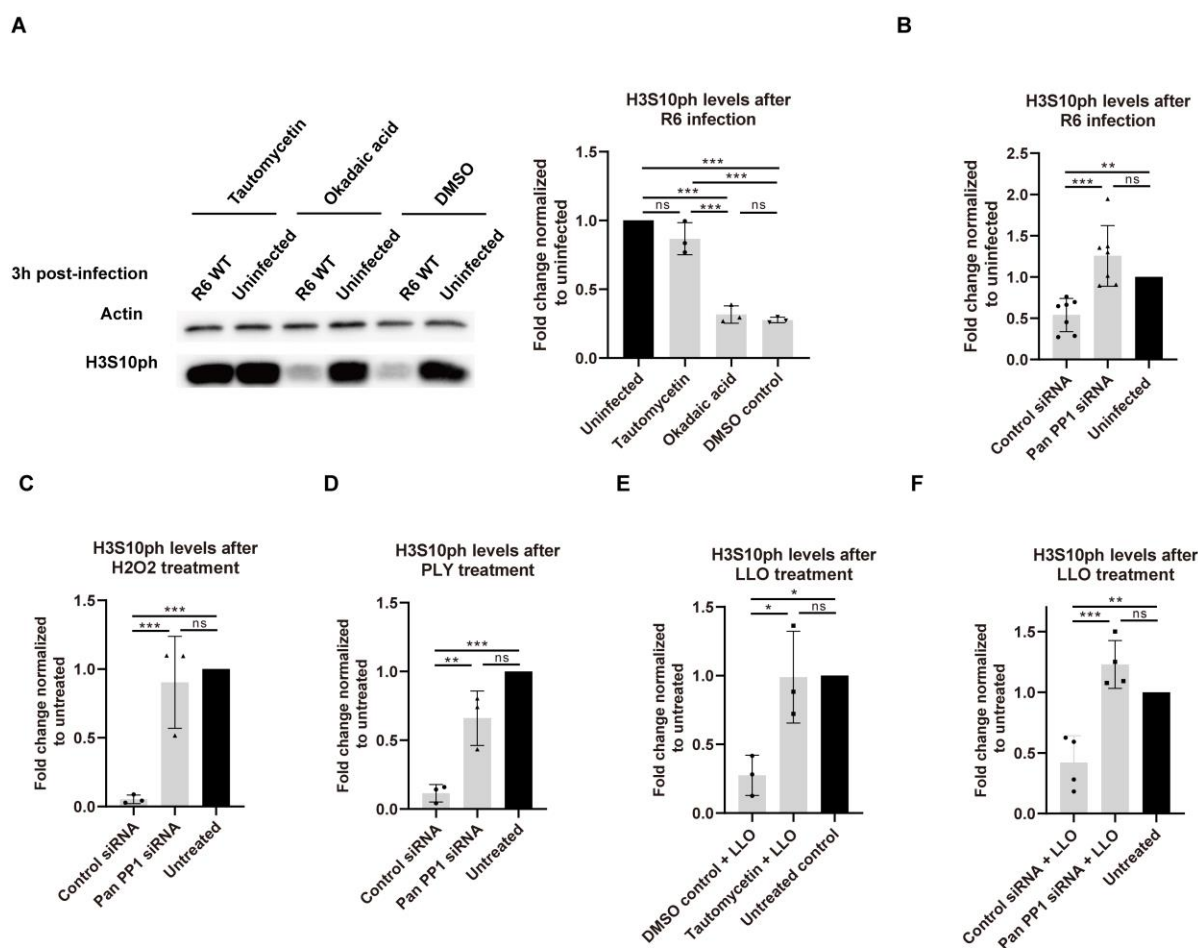

**Fig.4. PP1 is the host phosphatase mediating H3S10 dephosphorylation.**

(A) Representative immunoblots images are shown on the left and quantifications on the right. A549 cells pretreated with PP1 inhibitor Tautomycetin, PP2A inhibitor Okadaic acid or DMSO control and infected with R6 (MOI=50) for 3h. (B) A549 cells are transfected with PP1 siRNA or control siRNA prior to 3h R6 (MOI=50) infection. (C) A549 cells are transfected with PP1 siRNA or control siRNA prior to PLY treatment for 30 min. (D) A549 cells are transfected with PP1 siRNA or control siRNA prior to H2O2 treatment for 1h. (E) HeLa cells are pretreated with PP1 inhibitor Tautomycetin prior to LLO treatment for 20 min. (F) HeLa cells are transfected with PP1 siRNA or control siRNA prior to LLO treatment for 20 min.

All quantification graphs above are of at least 3 independent experiments. All quantifications in graphs show the mean  $\pm$  SD and statistical significance was calculated using One-way ANOVA method (Turkey Post Hoc test), \*\*P < 0.01, \*\*\*P < 0.001.

**Figure 5.**

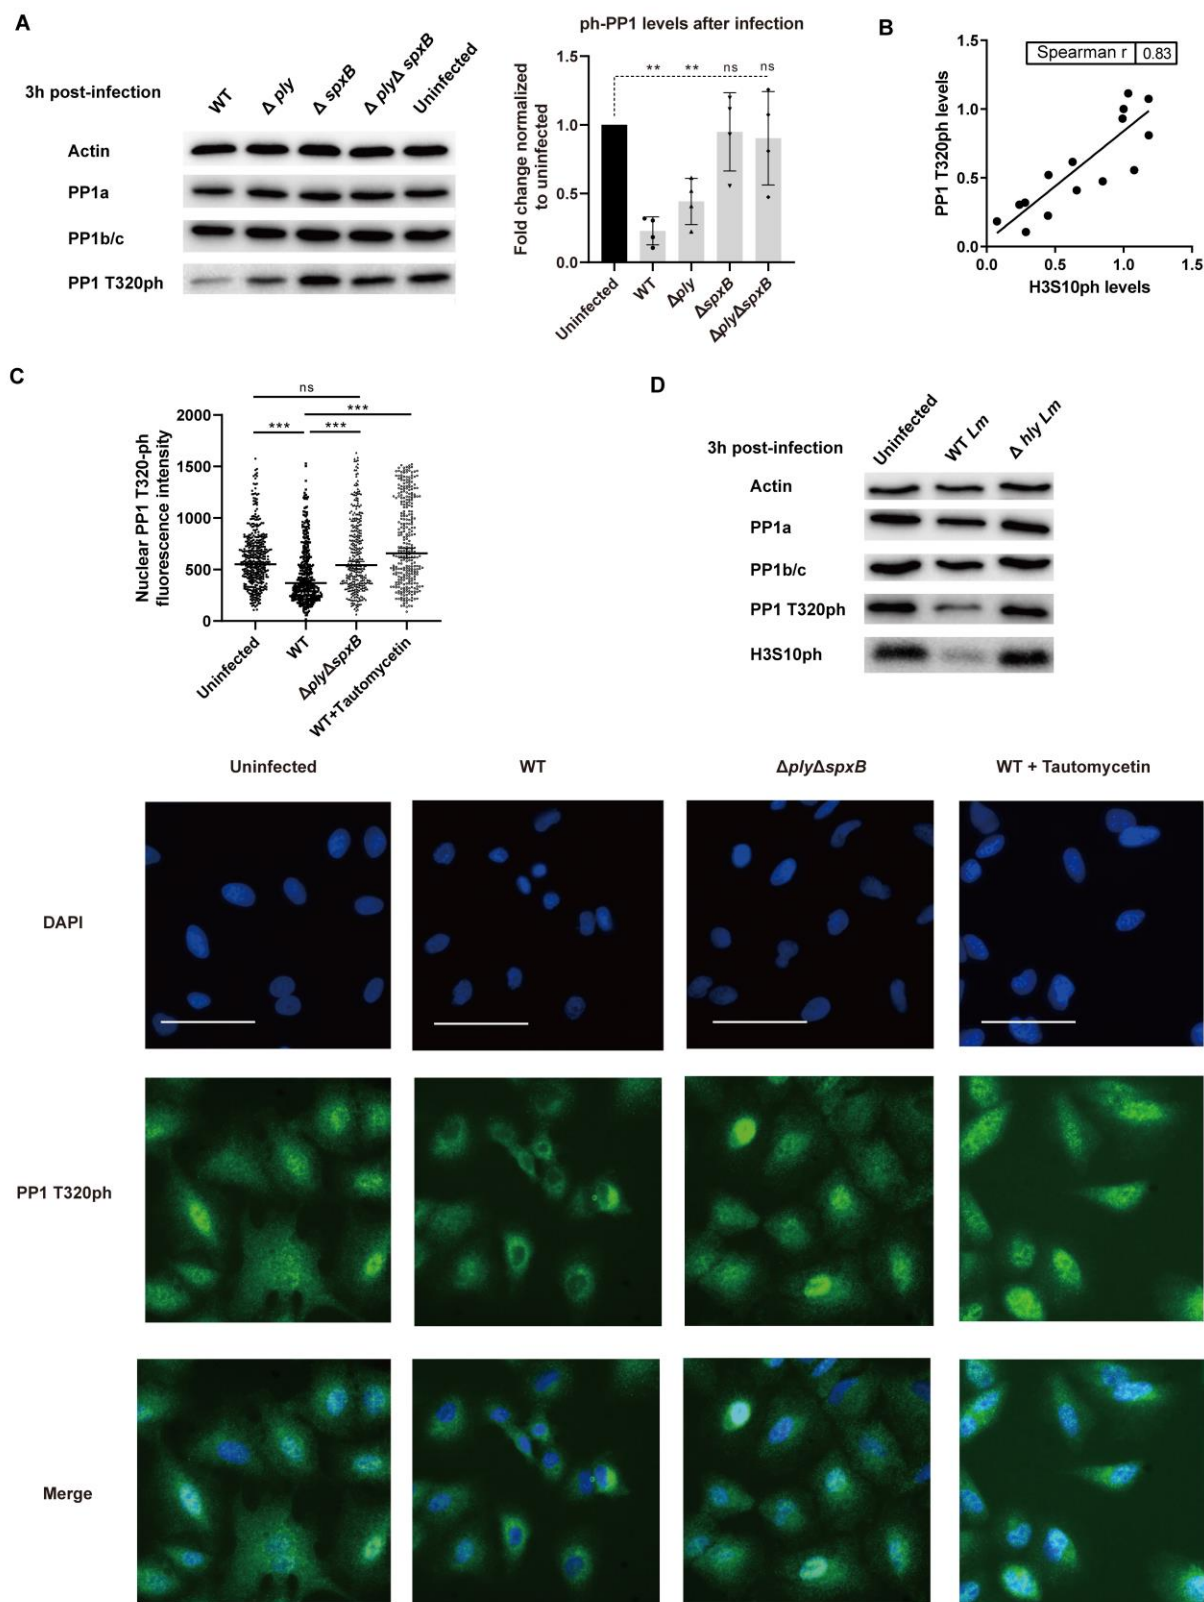

**Fig. 5. Bacterial infection induces dephosphorylation of PP1.**

(A) A549 cells were infected for 3 h with wild-type and indicated mutants of *S. pneumoniae* strain TIGR4 (MOI=25). A representative immunoblot (left) and a quantification (right) of 4 independent experiments are shown. The PP1 T320ph levels are normalized to PP1a and to the uninfected control condition. *S. pneumoniae*. Error bars represent SD and statistical

significance was calculated using One-way ANOVA method (Dunn's Post Hoc test, uninfected as control group),  $**P < 0.01$ . **(B)** The correlation of H3S10ph levels and PP1 T320ph levels of infected cells from 4 independent experiments is calculated using nonparametric Spearman's correlation coefficient method **(C)** Immunofluorescence of PP1 T320ph in A549 cells under uninfected, 3h wild-type TIGR4 infection, 3h  $\Delta ply \Delta spxB$  double mutant infection and 3h wild-type infection at MOI 25 with 3h Tautomycin pretreatment conditions. Size bars represent 50  $\mu\text{m}$ . Quantification of nuclear PP1 T320ph fluorescence intensity from at least 2 independent experiments, for more than 300 cells counted each condition. **(D)** HeLa cells were infected for 3 h with the wild-type *Listeria* (EGD strain) and its *hly* mutant at MOI 50. A representative immunoblot of 3 independent experiments is shown.

Figure 6.

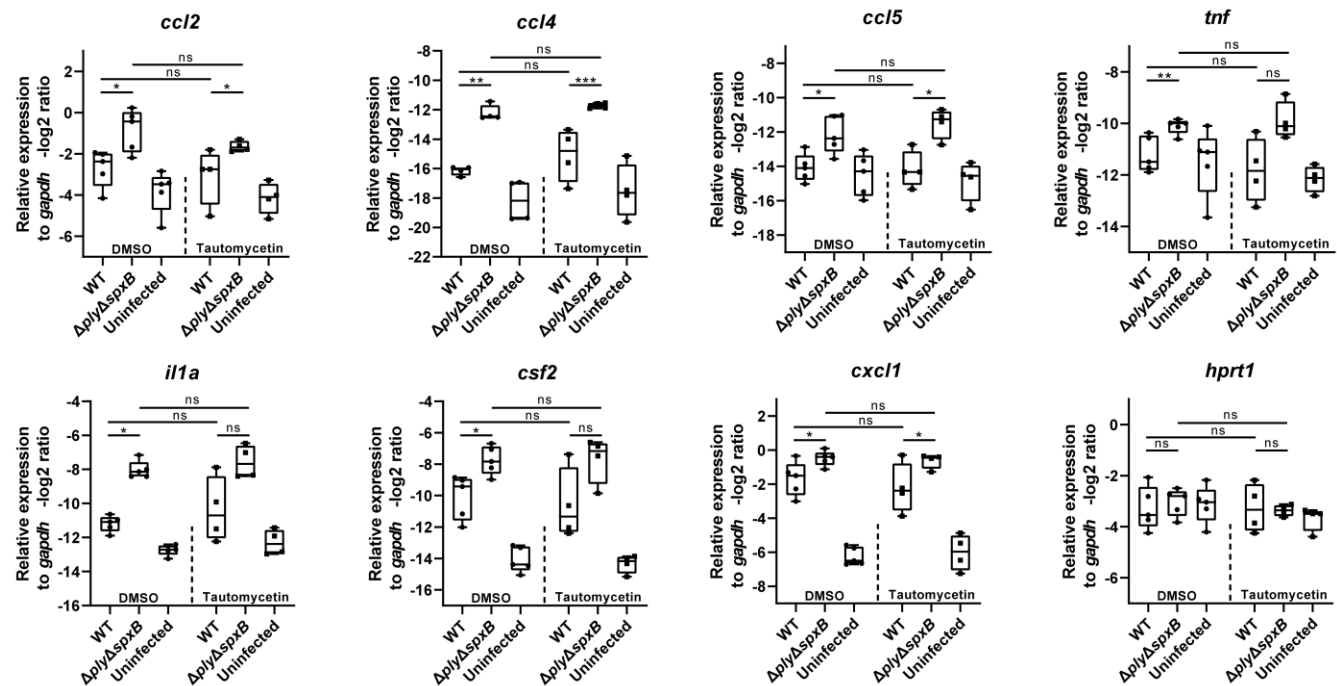

**Fig.6. H3S10 dephosphorylation correlates with transcriptional repression of inflammatory genes, but is not required.**

Untreated cells or Tautomycetin pretreated cells are infected by wild-type TIGR4 *S. pneumoniae* and its  $\Delta ply \Delta spxB$  double mutant at MOI 25. RNA was extracted and qRT-PCR was performed to analyze the relative expression of indicated inflammatory genes and housekeeping gene *hprt1*. The gene expression levels are shown as  $-\log_2$  relative to control gene *gapdh*, the results are shown as mean and SD of 4 independent experiments. For statistical calculation,  $-\log_2$  form data is first converted to the linear form by the  $2^{(-\Delta CT)}$  calculation, and then tested with a Student's t test method, \* $P < 0.05$ , \*\* $P < 0.01$ , \*\*\* $P < 0.001$ .

**Figure 7.**

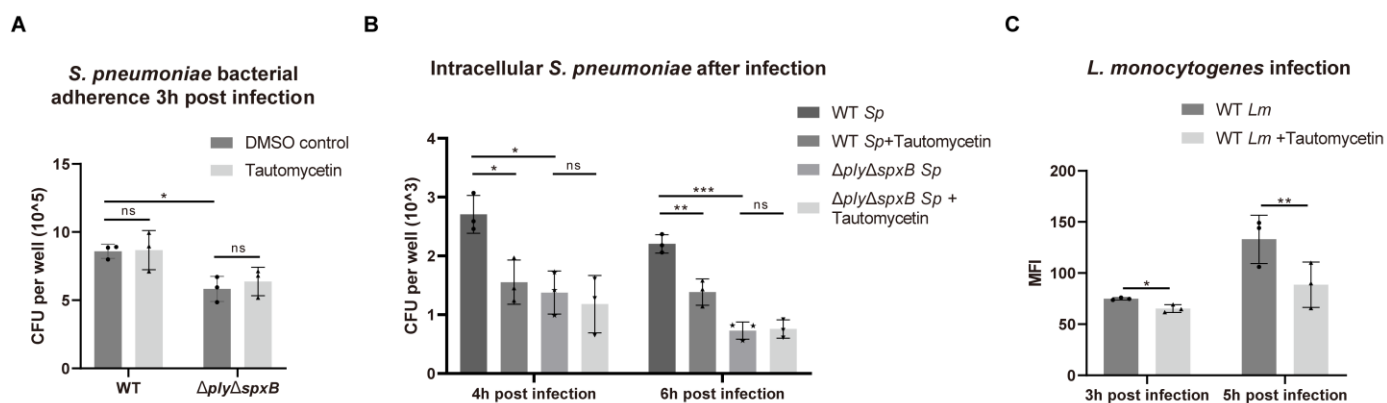

**Fig.7. H3S10 dephosphorylation is necessary for efficient bacterial infection**

Wild-type *S. pneumoniae* (R6) and its  $\Delta ply\Delta spxB$  double mutant were incubated with A549 epithelial cells at MOI 50 and assayed for either bacterial adherence (A) or intracellular bacteria (B). The results are mean  $\pm$  SD from 3 independent experiments and statistical significance was calculated using Student's t test method, \*P < 0.05. (c) Caco2 cells were infected with *L. monocytogenes* expressing GFP for the indicated times. Intracellular bacteria were detected by FACS analysis, and the mean fluorescence of intensity (MFI) was calculated. Results are mean  $\pm$  SD over 3 independent experiments. In each experiment the ratio between inhibitor group and untreated control group was calculated and the statistical significance was analyzed using Student's t test method, \*P < 0.05, \*\*P < 0.01.
